# Supplementary material
Source: Springer Nature journal article supplement (https://www.springermedizin.de/resource/supplementary/13002_2014_434_MOESM1_ESM.pdf/9626918)
Supplement: MOESM1 [file 9626918]

# Questionnaire form for ethnobotanical interviews

## University of Bologna

Department of Biological, Geological and Environmental Sciences, University of Bologna,  
Via Irnerio 42, 40126 Bologna, Italy

## Identity of the interviewed person

Name:

Surname:

Residence:

Gender: female  male

Age:

## Place of formation of the traditional knowledge

Place of birth:

Childhood place:

Teens age place:

Adult age place:

## Wild food plants

Do you use wild plants as food? Yes  No

In the past  Nowadays

Which ones? → *freely recall all the used wild food plants*

## Wild food plant mentioned:

Folk name

In which period of the year do you collect this plant?

Which parts of plant do you use?

How do you cook it?

During the collection period, how often do you eat it?

Once a day

Once a week

Once a month

Once a year

Never at present time, only in the past

I've never eaten it, I have only heard about it

## **Taste**

What does it taste like?

Sweet  Bitter  Acid  Salty  Astringent

How does it look like \_\_\_\_\_

Do your sons like it? Yes  No

Do your grandchildren like it? Yes  No

## **Functional foods/ Medical foods**

Do you use any mentioned wild food plant as medicine?

Do the used wild food plants have any beneficial effects on your health?

If yes, describe these effects in detail.

Do the used wild food plants have adverse effects?

If yes, which ones?

Do you think they can have any impact on your life and your health?

Do these plants relieve the symptoms of any disease?

If yes, which ones?
